# Supplementary material
Source: publisher figshare collection journal article supplement (https://asha.figshare.com/articles/dataset/_/8121131)
Supplement: Supplementary file 2 [file 1]

**Supplemental Material S1.** Reason for paper exclusion from final analysis.

| <b>Reason for exclusion</b>                                           | <b>Papers excluded</b>                                                                                                                                                                                                                                                                                                                                                                                                                                                                                                                                |
|-----------------------------------------------------------------------|-------------------------------------------------------------------------------------------------------------------------------------------------------------------------------------------------------------------------------------------------------------------------------------------------------------------------------------------------------------------------------------------------------------------------------------------------------------------------------------------------------------------------------------------------------|
| Conflates coughing with choking                                       | Abraham, Scheinberg, Smith, and LaRocca (1997); Burgess, Hughes, Griffiths, and Cadoux-Hudson (2009); De Pauw, Dejaeger, D'Hooghe, and Carton (2002); Hadjikitoutis, Eccles, and Wiles (2000); Holland et al. (2011); L. Lin et al. (2003); L. C. Lin, Wu, Chen, Wang, and Chen (2002); Marin et al. (2016); Rogers et al. (1994); Roy, Stemple, Merrill, and Thomas (2007); Runions, Rodrigue, and White (2004); Steele, Greenwood, Ens, Robertson, and Seidman-Carlson (1997)                                                                       |
| Conflates pneumonia with choking                                      | Goh et al. (2016)                                                                                                                                                                                                                                                                                                                                                                                                                                                                                                                                     |
| Conflates coughing and suffocation without noting food                | Shavelle, Strauss, Whyte, Day, and Yu (2001)                                                                                                                                                                                                                                                                                                                                                                                                                                                                                                          |
| Choking risk, no choking event                                        | Ball et al. (2012); Chadwick, Jolliffe, and Goldbart (2002)                                                                                                                                                                                                                                                                                                                                                                                                                                                                                           |
| Choking noted only as a symptom of dysphagia, no description or event | Chadwick and Jolliffe (2009); Kuhn and Matson (2002); Smith, Teo, and Simpson (2014)                                                                                                                                                                                                                                                                                                                                                                                                                                                                  |
| Mentioned, not described or defined                                   | Chadwick, Jolliffe, Goldbart, and Burton (2006); Cleary, Kizar, Kalra, and Johnston (2008); de Medeiros, Sassi, Mangilli, Zilberstein, and de Andrade (2014); Fodstad and Matson (2008); Guthrie, Roddam, Panna, and Fairburn (2012); Hayashi et al. (2016); Matson, Fodstad, and Boisjoli (2008); Matson and Kuhn (2001); Palmer, Herrington, Rad, and Cohen (2007); Perez et al. (2015); Regan, Sowman, and Walsh (2006); Thacker, Abdelnoor, Anderson, White, and Hollins (2008); Tong, Lee, Yuen, and Lo (2011); van den Engel-Hoek et al. (2016) |

## References

- Abraham, S., Scheinberg, L. C., Smith, C. R., & LaRocca, N. G. (1997). Neurologic impairment and disability status in outpatients with multiple sclerosis reporting dysphagia symptomatology. *Journal of Neurologic Rehabilitation*, *11*(1), 7–13.
- Ball, S. L., Panter, S. G., Redley, M., Proctor, C. A., Byrne, K., Clare, I. C., & Holland, A. J. (2012). The extent and nature of need for mealtime support among adults with intellectual disabilities. *Journal of Intellectual Disability Research*, *56*(4), 382–401. <https://doi.org/10.1111/j.1365-2788.2011.01488.x>
- Burgess, C., Hughes, R., Griffiths, S., & Cadoux-Hudson, T. (2009). A decade of unexplained dysphagia. *Ear, Nose & Throat Journal*, *88*(6), 958–960.
- Chadwick, D. D., & Jolliffe, J. (2009). A descriptive investigation of dysphagia in adults with intellectual disabilities. *Journal of Intellectual Disability Research*, *53*(1), 29–43. <https://doi.org/10.1111/j.1365-2788.2008.01115.x>
- Chadwick, D. D., Jolliffe, J., & Goldbart, J. (2002). Carer knowledge of dysphagia management strategies. *International Journal of Language & Communication Disorders*, *37*(3), 345–357. <https://doi.org/10.1080/13682820210137196>
- Chadwick, D. D., Jolliffe, J., Goldbart, J., & Burton, M. H. (2006). Barriers to caregiver compliance with eating and drinking recommendations for adults with intellectual disabilities and dysphagia. *Journal of Applied Research in Intellectual Disabilities*, *19*(2), 153–162. <https://doi.org/10.1111/j.1468-3148.2005.00250.x>
- Cleary, S., Kizar, S., Kalra, S., & Johnston, W. (2008). Using active rehabilitation to decrease the risk of pneumonia in end-of-life ALS and dementia care. *Canadian Nursing Home*, *19*(2), 4–10.
- de Medeiros, G. C., Sassi, F. C., Mangilli, L. D., Zilberstein, B., & de Andrade, C. R. F. (2014). Clinical dysphagia risk predictors after prolonged orotracheal intubation. *Clinics*, *69*(1), 8–14. [https://doi.org/10.6061/clinics/2014\(01\)02](https://doi.org/10.6061/clinics/2014(01)02)
- De Pauw, A., Dejaeger, E., D'Hooghe, B., & Carton, H. (2002). Dysphagia in multiple sclerosis. *Clinical Neurology & Neurosurgery*, *104*(4), 345–351.
- Fodstad, J., & Matson, J. (2008). A comparison of feeding and mealtime problems in adults with intellectual disabilities with and without autism. *Journal of Developmental & Physical Disabilities*, *20*(6), 541–550. <https://doi.org/10.1007/s10882-008-9116-6>
- Goh, K. H., Acharyya, S., Ng, S. Y. E., Boo, J. P. L., Kooi, A. H. J., Ng, H. L., . . . Tan, L. C. S. (2016). Risk and prognostic factors for pneumonia and choking amongst Parkinson's disease patients with dysphagia. *Parkinsonism & Related Disorders*, *29*, 30–34. <https://doi.org/10.1016/j.parkreldis.2016.05.034>
- Guthrie, S., Roddam, H., Panna, S., & Fairburn, G. (2012). Capacity to choose and refuse? A case study. *Advances in Mental Health and Intellectual Disabilities*, *6*(6), 293–300. <https://doi.org/10.1108/20441281211285937>
- Hadjikoutis, S., Eccles, R., & Wiles, C. M. (2000). Coughing and choking in motor neuron disease. *Journal of Neurology Neurosurgery and Psychiatry*, *68*(5), 601–604. <https://doi.org/10.1136/jnnp.68.5.601>
- Hayashi, M., Yahiro, A., Sakuragi, Y., Iwamatsu, K., Sakamoto, H., Kaizuka, Y., . . . Kamouchi, M. (2016). Impaired swallowing in hospitalized patients: An observational study in a community hospital in Japan (2012-2014). *Nursing Research*, *65*(5), 389–396. <https://doi.org/10.1097/nnr.0000000000000178>

- Holland, G., Jayasekeran, V., Pendleton, N., Horan, M., Jones, M., & Hamdy, S. (2011). Prevalence and symptom profiling of oropharyngeal dysphagia in a community dwelling of an elderly population: A self-reporting questionnaire survey. *Diseases of the Esophagus*, 24(7), 476–480. <https://doi.org/10.1111/j.1442-2050.2011.01182.x>
- Kuhn, D. E., & Matson, J. L. (2002). A validity study of the Screening Tool of Feeding Problems (STEP). *Journal of Intellectual and Developmental Disability*, 27(3), 161–167. <https://doi.org/10.1080/1366825021000008594>
- Lin, L., Wang, S., Chen, S. H., Wang, T., Chen, M., & Wu, S. (2003). Efficacy of swallowing training for residents following stroke. *Journal of Advanced Nursing*, 44(5), 469–478. <https://doi.org/10.1046/j.0309-2402.2003.02830.x>
- Lin, L. C., Wu, S. C., Chen, H. S., Wang, T. G., & Chen, M. Y. (2002). Prevalence of impaired swallowing in institutionalized older people in Taiwan. *Journal of the American Geriatrics Society*, 50(6), 1118–1123. <https://doi.org/10.1046/j.1532-5415.2002.50270.x>
- Marin, S. D. C., Bertolucci, P. H. F., Marin, L. F., de Oliveira, F. F., Wajman, J. R., Bahia, V. S., & Mansur, L. L. (2016). Swallowing in primary progressive aphasia. *Neurorehabilitation*, 38(1), 85–92. <https://doi.org/10.3233/nre-151299>
- Matson, J. L., Fodstad, J. C., & Boisjoli, J. A. (2008). Cutoff scores, norms and patterns of feeding problems for the Screening Tool of Feeding Problems (STEP) for adults with intellectual disabilities. *Research in Developmental Disabilities*, 29(4), 363–372. <https://doi.org/10.1016/j.ridd.2007.06.001>
- Matson, J. L., & Kuhn, D. E. (2001). Identifying feeding problems in mentally retarded persons: development and reliability of the screening tool of feeding problems (STEP). *Research in Developmental Disabilities*, 22(2), 165–172. [https://doi.org/10.1016/S0891-4222\(01\)00065-8](https://doi.org/10.1016/S0891-4222(01)00065-8)
- Palmer, A. D., Herrington, H. C., Rad, I. C., & Cohen, J. L. (2007). Dysphagia after endoscopic repair of Zenker's diverticulum. *Laryngoscope*, 117(4), 617–622. <https://doi.org/10.1097/MLG.0b013e3180305061>
- Perez, C. M., Ball, S. L., Wagner, A. P., Clare, I. C., Holland, A. J., & Redley, M. (2015). The incidence of healthcare use, ill health and mortality in adults with intellectual disabilities and mealtime support needs. *Journal of Intellectual Disability Research*, 59(7), 638–652. <https://doi.org/10.1111/jir.12167>
- Regan, J., Sowman, R., & Walsh, I. (2006). Prevalence of dysphagia in acute and community mental health settings. *Dysphagia*, 21(2), 95–101. <https://doi.org/10.1007/s00455-006-9016-9>
- Rogers, B., Stratton, P., Msall, M., Andres, M., Champlain, M. K., Koerner, P., & Piazza, J. (1994). Long-term morbidity and management strategies of tracheal aspiration in adults with severe developmental disabilities. *American Journal on Mental Retardation*, 98(4), 490–498.
- Roy, N., Stemple, J., Merrill, R. M., & Thomas, L. (2007). Dysphagia in the elderly: Preliminary evidence of prevalence, risk factors, and socioemotional effects. *Annals of Otolaryngology & Rhinology & Laryngology*, 116(11), 858–865.
- Runions, S., Rodrigue, N., & White, C. (2004). Practice on an acute stroke unit after implementation of a decision-making algorithm for dietary management of dysphagia. *Journal of Neuroscience Nursing*, 36(4), 200–207.
- Shavelle, R. M., Strauss, D., Whyte, J., Day, S. M., & Yu, Y. L. (2001). Long-term causes of death after traumatic brain injury. *American Journal of Physical Medicine & Rehabilitation*, 80(7), 510–539.
- Smith, C. H., Teo, Y., & Simpson, S. (2014). An observational study of adults with Down syndrome eating independently. *Dysphagia*, 29(1), 52–60. <https://doi.org/10.1007/s00455-013-9479-4>

- Steele, C. M., Greenwood, C., Ens, I., Robertson, C., & Seidman-Carlson, R. (1997). Mealtime difficulties in a home for the aged: Not just dysphagia. *Dysphagia*, *12*(1), 43–50.
- Thacker, A., Abdelnoor, A., Anderson, C., White, S., & Hollins, S. (2008). Indicators of choking risk in adults with learning disabilities: A questionnaire survey and interview study. *Disability and Rehabilitation*, *30*(15), 1131–1138. <https://doi.org/10.1080/09638280701461625>
- Tong, M., Lee, K., Yuen, M., & Lo, P. (2011). Perceptions and experiences of post-irradiation swallowing difficulties in nasopharyngeal cancer survivors. *European Journal of Cancer Care*, *20*(2), 170–178. <https://doi.org/10.1111/j.1365-2354.2010.01183.x>
- van den Engel-Hoek, L., de Groot, I. J. M., Sie, L. T., van Bruggen, H. W., de Groot, S. A. F., Erasmus, C. E., & van Alfen, N. (2016). Dystrophic changes in masticatory muscles related chewing problems and malocclusions in Duchenne muscular dystrophy. *Neuromuscular Disorders*, *26*(6), 354–360. <https://doi.org/10.1016/j.nmd.2016.03.008>
